# Supplementary material for: Effectiveness of Systematic Echocardiographic Screening for Rheumatic Heart Disease in Nepalese Schoolchildren: A Cluster Randomized Clinical Trial
Source: PubMed Central journal article supplement (PMC7818193; doi:10.1001/jamacardio.2020.7050), 2021-01-20
Supplement: jamacardiol-e207050-s003.pdf [file jamacardiol-e207050-s003.pdf]

## Data Sharing Statement

Karki. Effectiveness of Systematic Echocardiographic Screening for Rheumatic Heart Disease in Nepalese Schoolchildren. *JAMA Cardiol.* Published January 20, 2021. doi:10.1001/jamacardio.2020.7050

### Data

**Data available:** Yes

**Data types:** Deidentified participant data

**How to access data:** [www.rhedproject.org](http://www.rhedproject.org)

**When available:** With publication

### Supporting Documents

**Document types:** Statistical/analytic code

**How to access documents:** [www.rhedproject.org](http://www.rhedproject.org)

**When available:** With publication

### Additional Information

**Who can access the data:** The data will be made available to anyone requesting the data.

**Types of analyses:** The data will be made available for any non-commercial Purpose.

**Mechanisms of data availability:** The data will be made available without Investigator support.
